# Supplementary material
Source: PubMed Central journal article supplement (PMC4817636)
Supplement: ismej201566x1.pdf [file ismej201566x1.pdf]

**Metagenomic and lipid analyses reveal a diel cycle in a hypersaline microbial ecosystem**

**Supplemental Documents**

**Table of Contents**

|                                                                                                                                                                                                             |      |
|-------------------------------------------------------------------------------------------------------------------------------------------------------------------------------------------------------------|------|
| <u>Supplemental Methods 1.</u> Lipid Extraction and experimental information                                                                                                                                | p.2  |
| <u>Supplemental Methods 2.</u> Reconstruction of 16S rRNA sequences and estimation of relative abundance using EMIRGE                                                                                       | p.5  |
| <br>                                                                                                                                                                                                        |      |
| <u>Table S1:</u> Range of ion concentrations in the lake water                                                                                                                                              | p.7  |
| <u>Table S2.</u> Influence of ion concentrations lipid-derived community profile                                                                                                                            | p.8  |
| <u>Table S3:</u> EMIRGE reconstructed 16S rRNA sequences from all genomic datasets                                                                                                                          | p.9  |
| <u>Table S4.</u> Profile of the composition of the 0.7µm filter based on metagenomic Analysis                                                                                                               | p.13 |
| <br>                                                                                                                                                                                                        |      |
| <u>Supplemental Figure S1.</u> Relative changes in ion concentrations during the sampling period.                                                                                                           | p.14 |
| <u>Supplemental Figure S2.</u> Typical GC-FID chromatogram of lipids derived from alkaline hydrolysis of planktonic microorganisms in Lake Tyrrell obtained by filtration and taken at t=0hours.            | p.15 |
| <u>Supplemental Figure S3:</u> Concentrations of different groups of fatty acids [µg (l lake water) <sup>-1</sup> ] vs. time [h]                                                                            | p.16 |
| <u>Supplemental Figure S4.</u> Nanohaloarchaea and Halobacteria exhibit opposite relative abundance trends in 0.1 µm filter samples during a diel cycle based on reconstructed 16S rRNA abundance patterns. | p.17 |

## **Supplemental Methods 1.**

### **S1.1 Core Lipid Saponification and Identification**

Core lipid concentrations were measured by GC-FID after alkaline saponification of the microbial biomass (Table 2). Quantification of saponified whole cell lipids was achieved on an Agilent 6890 GC-FID system using a high temperature capillary column (J&W Agilent Technologies, Santa Clara, CA, USA, DB-5HT, 30 m length, 0.25 mm inner diameter, 0.1  $\mu\text{m}$  film thickness) with helium as carrier gas (constant flow). The GC oven was programmed from 60 °C (2 min) to 350 °C at a rate of 4 °C  $\text{min}^{-1}$ , followed by an isothermal phase of 20 min. The injector temperature was programmed from 60 °C (5 s) to 350°C (60 s) at 10°C  $\text{s}^{-1}$ . Behenic acid methyl ester was used as internal standard.

The TMS and methylester derivatives were identified by GC-MS in full scan mode using an Agilent 6890N gas chromatograph (Agilent Technologies, Santa Clara, CA, United States) equipped with a DB-5 column (60 m, 0.25 mm, 0.25  $\mu\text{m}$  film thickness, Agilent J&W Agilent Technologies, Santa Clara, CA, USA) with helium as carrier gas (constant flow). The GC oven was programmed from 40°C (2 min) to 315°C at a rate of 4°C  $\text{min}^{-1}$ , followed by an isothermal phase of 50 min. The injector temperature was programmed from 40°C (5 s) to 315°C (60 s) at 10°C  $\text{s}^{-1}$ . The gas chromatograph was coupled to an AutoSpec Premier sector field mass spectrometer (Micromass MS Technologies, Manchester, UK, mass range: 55 - 600 da) run at an electron impact ionization energy (EI) of 70 eV and source temperature of 260°C. Compounds were identified using retention times and mass spectra in comparison to commercial available standards.

### **S1.2 Core lipid quantification errors**

To determine the quantification error using GC-FID, we performed repeat-injection experiments (up to four times) of selected samples. The determined average standard deviation for FA and archaeol quantification was 2.6% and the range 0.2% for the highest concentrated lipid (DPG) to 7% for less abundant compounds. We also split three samples into three batches each and derivatized them separately. The resulting average

standard deviation for absolute compound concentrations, including derivatisation and integration errors, was 4.1%.

### **S1.3 Intact polar lipids (IPLs)**

To assess the presence of lipids that are not GC-MS amenable such as GDGTs that would distort bacterial/archaeal abundance measurements based on core lipids, we performed HPLC-MS characterization of the IPL fraction. The only detected core lipid not amenable to GC was halocapnine that occurred as a component of a bacterial sulfonolipid. However, this lipid only occurred in minor concentrations. GDGTs were not detected. Detailed results of the IPL analyses will be reported in a forthcoming manuscript.

#### **S1.3.1 Extraction of IPLs**

One quarter of each filter was used for lipid extraction using a modified Bligh and Dyer procedure (Sturt et al 2004) For the first three extraction steps, the extraction solvent consisted of methanol, dichloromethane and phosphate buffer (8.7 g  $K_2HPO_4$  per liter water) in a composition of 2:1:0.8 (v:v:v). For the following three extraction steps an aqueous solution of trichloroacetic acid (50 g  $L^{-1}$   $CCl_3COOH$ ) was used for the Bligh-Dyer mixture instead of the phosphate buffer. After sonication for 10 min and centrifugation for 4 min the supernatants were combined in a separation funnel. Dichloromethane and water were added to the mixture to achieve phase separation at a final methanol/dichloromethane/buffer ratio of 1:1:0.8. After removing the organic phase containing the IPLs, the aqueous phase was extracted two more times with dichloromethane. All organic solvents were GC Resolv1 or Optima1 grade (Mallinckrodt, Phillipsburg, NJ, USA); deionized water was obtained from a MilliQ1 system (Millipore, Billerica, MA, USA). To reduce the loss of intact polar lipids prior to analysis via HPLC MS, no separation or cleaning of the extracts was performed.

#### **S1.3.2 HPLC-analysis of IPLs**

Extracts were dissolved in Eluent A, and phosphatidylethanolamine glycerol dialkylether (O-PE, Avanti polar lipids, inc., Alabaster, AL, USA) with side chains containing 16 carbon atoms, each) was added as injection standard. Phospholipids were analyzed on an HPLC instrument (Agilent 1100 Series, Agilent Technologies, Santa Clara, CA, USA)

coupled to an LCQ DECA XP ion-trap mass spectrometer (Thermo Finnigan, San Jose, CA, USA) equipped with an electrospray ionization source (ESI). HPLC separation was achieved, as described by Rütters et al. (2001), on a diol phase (LiChrospher100 Diol 5  $\mu$ , CS - Chromatographie Service GmbH, Langerwehe, Germany) using a 125 x 3 mm column with 20 mm guard column filled with the same material. A flow rate of 0.2 ml  $\text{min}^{-1}$  was employed with the following solvent gradient: 1 min 100 % A, increasing over 20 min to 35 % A, 65 % B using a linear gradient, followed by 40 min of reconditioning. Eluent A was a mixture of *n*-hexane, isopropanol, formic acid, ammonia (25 % solution in water) (79:20:1.2:0.04 by volume), eluent B was isopropanol, water, formic acid, ammonia (25 % solution in water) (88:10:1.2:0.04 by volume). The optimal mass spectrometer settings were determined by direct injection of the injection standard O-PE. For negative ion-mode the mass spectrometer was set to a spray voltage of 3 kV, sheath gas flow of 30 (arbitrary units), capillary voltage of -45 V and a capillary temperature of 220°C. For positive ion-mode we observed highest ion intensities with a spray voltage of 3 kV, sheath gas flow of 20 (arbitrary units), capillary voltage of +40 V and a capillary temperature of 200°C. MS/MS experiments were done in the dependent-scan mode, i.e. the most intense quasi-molecular ion species of each full scan was automatically isolated and fragmented up to  $\text{MS}^3$ . Helium was used as collision gas (relative collision energy: 30 – 60 %, depending on compound). Mass spectra (full scan and MS/MS) were used for compound identification and determination. Confirmation of identified compounds was achieved by determination of accurate masses with a high resolution HPLC-ESI-MS system (2695 separations module coupled to Micromass Q-TOF micro, Waters, Milford, MA, USA) without any HPLC separation.

## References

Sturt HF, Summons RE, Smith K, Elvert M & Hinrichs KU (2004) Intact polar membrane lipids in prokaryotes and sediments deciphered by high-performance liquid chromatography/electrospray ionization multistage mass spectrometry - new biomarkers for biogeochemistry and microbial ecology. *Rapid Commun Mass Sp* **18**: 617-628.

## **Supplemental Methods 2.**

### **2.1 Reconstruction of 16S rRNA sequences and estimation of relative abundance using EMIRGE**

As an independent measure of community structure dynamics, the expectation maximization iterative reconstruction of genes from the environment (EMIRGE) method (Miller et al 2011) was used to assemble near-full-length 16S rRNA gene sequences from community genomic sequencing reads. Unassembled metagenome sequence from all filter sizes were initially included in the analysis. As 0.1% of paired end reads were estimated to belong to 16S rRNA genes, samples with 226,000 or less reads were excluded from the analysis, leaving 9 samples (Table S2). A SILVA database (release 108), to which the 16S rRNA sequences of additional published Nanohaloarchaea were added, was used to run EMIRGE on each sample. To estimate relative abundance, unique EMIRGE-assembled 16S rRNA sequences were then combined into a candidate database used for a second modified EMIRGE run with parameters set to allow no merging or splitting (-j 1 and -p 1) of new sequences. This allowed an estimation of relative abundance of each reconstructed sequence in each sample. We used the Ribosomal Database Project (RDP) classifier (Wang et al 2007) for hierarchical taxa assignment at the genus and family OTU classification level, with a confidence threshold for each assignment of at least 80%. The relative abundances of sequences of the same genus or family in a sample were summed. Since published Nanohaloarchaea were not part of the RDP database, we used published Nanohaloarchaeal sequences to identify closely related sequences in the EMIRGE output. Sequences with 95% identity to the published sequences were classified as Nanohaloarchaea. We used the Database Enabled Code for

Ideal Probe Hybridization Employing R (DECIPHER) with default parameters to screen for potential chimeras; none were found (Wright et al 2012).

### References

Miller CS, Baker BJ, Thomas BC, Singer SW, Banfield JF (2011). EMIRGE: reconstruction of full-length ribosomal genes from microbial community short read sequencing data. *Genome Biol* **12**.

Sturt HF, Summons RE, Smith K, Elvert M, Hinrichs KU (2004). Intact polar membrane lipids in prokaryotes and sediments deciphered by high-performance liquid chromatography/electrospray ionization multistage mass spectrometry - new biomarkers for biogeochemistry and microbial ecology. *Rapid Commun Mass Sp* **18**: 617-628.

Wang Q, Garrity GM, Tiedje JM, Cole JR (2007). Naive Bayesian classifier for rapid assignment of rRNA sequences into the new bacterial taxonomy. *Appl Environ Microb* **73**: 5261-5267.

Wright ES, Yilmaz LS, Noguera DR (2012). DECIPHER, a Search-Based Approach to Chimera Identification for 16S rRNA Sequences. *Appl Environ Microb* **78**: 717-725.

**Supplemental Table S1:** Range of ion concentrations in the lake water.

| Sampling point [h]            | 0                                  | 66                    |            |
|-------------------------------|------------------------------------|-----------------------|------------|
| Ion                           | concentration mmol L <sup>-1</sup> |                       | change [%] |
| Na <sup>+</sup>               | 3.37× 10 <sup>3</sup>              | 3.30× 10 <sup>3</sup> | - 2        |
| Mg <sup>2+</sup>              | 0.38× 10 <sup>3</sup>              | 0.45× 10 <sup>3</sup> | + 21       |
| K <sup>+</sup>                | 31.24                              | 36.13                 | + 16       |
| Ca <sup>2+</sup>              | 7.98                               | 6.35                  | - 20       |
| Sr <sup>2+</sup>              | 0.12                               | 0.13                  | + 14       |
| B <sup>3+</sup>               | 0.24                               | 0.29                  | + 19       |
| Li <sup>+</sup>               | 0.16                               | 0.19                  | + 21       |
| Mn <sup>2+</sup>              | 0.004                              | 0.012                 | + 202      |
| Cl <sup>-</sup>               | 4.67× 10 <sup>3</sup>              | 4.72× 10 <sup>3</sup> | + 1        |
| SO <sub>4</sub> <sup>2-</sup> | 0.12× 10 <sup>3</sup>              | 0.15× 10 <sup>3</sup> | + 21       |
| Br <sup>-</sup>               | 5.85                               | 5.56                  | - 5        |

**Supplemental Table S2:** Influence of ion concentrations on the lipid-derived community profile (PCoA, Figure 3a) determined via PERMANOVA. Since no significant p-values were detected, the ion concentrations appear to not influence the lipid-derived community profile.

|                               |       |
|-------------------------------|-------|
| Na <sup>+</sup>               | 0.305 |
| Mg <sup>2+</sup>              | 0.797 |
| K <sup>+</sup>                | 0.847 |
| Ca <sup>2+</sup>              | 0.587 |
| Sr <sup>2+</sup>              | 0.433 |
| B <sup>3+</sup>               | 0.707 |
| Li <sup>+</sup>               | 0.329 |
| Mn <sup>2+</sup>              | 0.732 |
| Cl <sup>-</sup>               | 0.704 |
| SO <sub>4</sub> <sup>2-</sup> | 0.472 |
| Br <sup>-</sup>               | 0.427 |



**Supplemental Table S3:** EMIRGE reconstructed 16S rRNA sequences from all genomic datasets.

| EMIRGE identifier | EMIRGE generated Organism code | Organism classification  | LT2010_0.1 AM 1 | LT2010_0.8 AM 1 | LT2010_0.1 PM 1 | LT2010_3.0 PM 1 | LT2010_0.1 AM 2 | LT2010_0.8 AM 2 | LT2010_0.1 PM 2 | LT2010_3.0 PM 2 | LT2010_3.0 PM 3 |
|-------------------|--------------------------------|--------------------------|-----------------|-----------------|-----------------|-----------------|-----------------|-----------------|-----------------|-----------------|-----------------|
| 1                 | GL982576.1                     | Candidatus Nanosalina    | 0.306648        | 0.022371        | 0.136534        | 0.019423        | 0.37111         | 0.040627        | 0.212106        | 0.030899        | 0.031587        |
| 74                | AF435111.1.1471                | Halobacteriaceae         | 0.06665         | 0.125015        | 0.102696        | 0.05765         | 0.081426        | 0.125955        | 0.14656         | 0.014035        | 0.07307         |
| 21                | FN391220.1.1345                | Haloquadratum            | 0.061292        | 0.126846        | 0.097841        | 0.205971        | 0.03888         | 0.121426        | 0.044158        | 0.134167        | 0.163772        |
| 184               | AY838278.1.1473                | Haloquadratum            | 0.025751        | 0.054981        | 0.041652        | 0.123513        | 0.013161        | 0.037296        | 0.016764        | 0.07613         | 0.092073        |
| 36                | CU467230.3.1357                | Haloquadratum            | 0.013462        | 0.03183         | 0.035136        | 0.081651        | 0.008437        | 0.0481          | 0.023456        | 0.084888        | 0.06957         |
| 268               | FN391240.1.1345                | Haloquadratum            | 0.006057        | 0.048996        | 0.040538        | 0.044617        | 0.025313        | 0.038762        | 0.047803        | 0.027295        | 0.0315          |
| 2                 | GL982569.1                     | Candidatus Nanosalinarum | 0.069385        | 0.003875        | 0.032212        | 0.00566         | 0.041317        | 0.007582        | 0.030122        | 0.014897        | 0.005976        |
| 638               | AJ270249.1.1461_m01            | Halorubrum               | 0.016493        | 0.037364        | 0.015534        | 0.014352        | 0.012651        | 0.046263        | 0.030689        | 0.006225        | 0.012455        |
| 26                | CU467268.2.1356                | Halobacteriaceae         | 0.017556        | 0.038876        | 0.035013        | 0.036143        | 0.007947        | 0.041846        | 0.014409        | 0.03249         | 0.020865        |
| 17                | FN393543.1.1362                | Salinibacter             | 0.0236          | 0.030062        | 0.043557        | 0.031246        | 0.017726        | 0.018079        | 0.009464        | 0.023235        | 0.043527        |
| 20                | CU467211.3.1344                | Haloquadratum            | 0.009159        | 0.033432        | 0.024624        | 0.035484        | 0.004327        | 0.037572        | 0.012585        | 0.019043        | 0.026997        |
| 564               | AY862784.1.1402                | Bacteroidetes            | 0.005262        | 0.008358        | 0.012034        | 0.024879        | 0.013893        | 0.038218        | 0.019596        | 0.055355        | 0.061644        |
| 176               | CU467143.1.1344                | Halorubrum               | 0.021483        | 0.011943        | 0.029639        | 0.012409        | 0.011959        | 0.015284        | 0.023745        | 0.033542        | 0.01286         |
| 112               | FN391263.1.1344                | Halorubrum               | 0.002311        | 0.014993        | 0.021594        | 0.00761         | 0.016912        | 0.019242        | 0.010516        | 0.008107        | 0.00992         |
| 254               | FN391293.1.1345                | Halorhabdus              | 0.024497        | 0.019304        | 0.037433        | 0.006011        | 0.013027        | 0.012913        | 0.016954        | 0.005646        | 0.005836        |
| 107               | FN391274.1.1344                | Candidatus Haloredivivus | 0.026788        | 0               | 0.008295        | 0               | 0.019204        | 0.002921        | 0.021214        | 0               | 0.0031          |
| 211               | EF459716.1.1519                | Salinibacter             | 0.004943        | 0.007906        | 0.010061        | 0.008696        | 0.006937        | 0.010766        | 0.008827        | 0.013781        | 0.017768        |
| 337               | EU538190.1.1396                | Pseudomonas              | 0               | 0               | 0               | 0               | 0.074523        | 0.002971        | 0.004616        | 0               | 0               |
| 179               | EF533958.1.1551                | Halomicrobium            | 0.015533        | 0.015592        | 0.012108        | 0.026902        | 0.007368        | 0.026459        | 0.025211        | 0.019152        | 0.019545        |

|     |                     |                  |          |          |          |          |          |          |          |          |          |
|-----|---------------------|------------------|----------|----------|----------|----------|----------|----------|----------|----------|----------|
| 643 | EF468473.1.1470_m01 | Halobacteriaceae | 0.023991 | 0.011879 | 0.012957 | 0.004094 | 0.014204 | 0.011926 | 0.01752  | 0.011946 | 0.010025 |
| 482 | GQ282618.1.1471     | Haloquadratum    | 0.008582 | 0.047589 | 0.010604 | 0.027664 | 0.006001 | 0.02702  | 0.009336 | 0.018004 | 0.018549 |
| 839 | FN393543.1.1362_m76 | Salinibacter     | 0.009609 | 0.012913 | 0.014118 | 0.015595 | 0.008877 | 0.007994 | 0.008607 | 0.020224 | 0.032044 |
| 140 | EF690618.1.1445     | Halobacteriaceae | 0.003803 | 0.010158 | 0.004386 | 0.0068   | 0.00325  | 0.010201 | 0.004344 | 0.00433  | 0.007513 |
| 88  | AM947502.1.1345     | Halobacteriaceae | 0.013599 | 0.03393  | 0.012149 | 0.001883 | 0.004137 | 0.012846 | 0.01076  | 0.007181 | 0.014389 |
| 98  | CU467180.3.1354     | Haloquadratum    | 0.007285 | 0.00615  | 0.007288 | 0.001965 | 0.006726 | 0.002877 | 0.006292 | 0.010914 | 0.004411 |
| 289 | DQ432495.1.1399     | Halobacteriaceae | 0.003516 | 0.009917 | 0.008726 | 0.017261 | 0.014802 | 0.009069 | 0.006928 | 0.024406 | 0.014997 |
| 316 | EF690563.1.1439     | Halobacteriaceae | 0.004727 | 0.012463 | 0.009586 | 0.018283 | 0.000671 | 0.010194 | 0.003273 | 0.017673 | 0.022148 |
| 22  | EF459702.1.1440     | Halomicrobium    | 0.008172 | 0.005742 | 0.005072 | 0.00281  | 0.002986 | 0.002532 | 0.004085 | 0.009141 | 0.003231 |
| 101 | GQ282622.1.1467     | Halobacteriaceae | 0.003541 | 0.007358 | 0.00614  | 0.016151 | 0.007651 | 0.012316 | 0.007451 | 0.010752 | 0.01356  |
| 58  | AM947497.1.1343     | Halobacteriaceae | 0.005455 | 0.00635  | 0.006243 | 0.005553 | 0.006678 | 0.007467 | 0.006666 | 0.013298 | 0.003301 |
| 30  | CU467261.1.1348     | Halobacteriaceae | 0.005055 | 0.010734 | 0.011351 | 0.005258 | 0.007071 | 0.006368 | 0.002383 | 0.020953 | 0.011837 |
| 287 | EU562182.1.1478     | Halorubrum       | 0.006542 | 0.009091 | 0.004605 | 0.013004 | 0.002263 | 0.004192 | 0.012965 | 0.006438 | 0.006515 |
| 65  | DQ432537.1.1395     | Halobacteriaceae | 0.009417 | 0.006287 | 0.005323 | 0.00336  | 0.006218 | 0.005213 | 0.003314 | 0.006611 | 0.003152 |
| 59  | AM947487.1.1342     | Halobacteriaceae | 0.003793 | 0.004751 | 0.008137 | 0.001785 | 0.002038 | 0.005086 | 0.005545 | 0.006322 | 0.001322 |
| 44  | AM947477.1.1344     | Halobacteriaceae | 0.006602 | 0.007157 | 0.006254 | 0.0029   | 0.001362 | 0.008938 | 0.007042 | 0.002696 | 0.00369  |
| 842 | EF468473.1.1470_m34 | Halobacteriaceae | 0.002042 | 0.013332 | 0.004385 | 0.003991 | 0.005062 | 0.007432 | 0.011219 | 0.010915 | 0.004787 |
| 76  | EU722666.1.1246     | Halorhabdus      | 0.009702 | 0.006915 | 0.002199 | 0.002771 | 0.003374 | 0.004292 | 0.003629 | 0.004913 | 0.002159 |
| 163 | EF690613.1.1440     | Halobacteriaceae | 0.003937 | 0.004909 | 0.003473 | 0.004136 | 0.004553 | 0.004693 | 0.004497 | 0.005924 | 0.004333 |
| 69  | AM947448.1.1343     | Haloquadratum    | 0.004414 | 0.01128  | 0.004892 | 0.0063   | 0.001959 | 0.005035 | 0.005681 | 0.009676 | 0.007598 |
| 199 | AM947454.1.1343     | Halobacteriaceae | 0.003161 | 0.004988 | 0.005357 | 0.001139 | 0.004344 | 0.003413 | 0.003442 | 0        | 0.001561 |
| 41  | CU467267.2.1356     | Halobacteriaceae | 0.005525 | 0        | 0.004224 | 0.001234 | 0.002986 | 0.002036 | 0.004005 | 0.003806 | 0        |
| 187 | EF690583.1.1440     | Halobacteriaceae | 0.006621 | 0.005817 | 0.005996 | 0.007316 | 0.009781 | 0.007985 | 0.011772 | 0.007127 | 0.005184 |
| 154 | CU467189.3.1357     | Halobacteriaceae | 0.001485 | 0.004869 | 0.003093 | 0.003895 | 0.000893 | 0.003066 | 0.00202  | 0.006098 | 0.006154 |
| 216 | AY987828.1.1441     | Halobacteriaceae | 0.008812 | 0.005519 | 0.002134 | 0.007385 | 0.002272 | 0.003302 | 0.003485 | 0.011866 | 0.004696 |
| 841 | EF459716.1.1519     | Salinibacter     | 0.008292 | 0.006016 | 0.004931 | 0.008795 | 0.004343 | 0.008146 | 0.003361 | 0.009439 | 0.005866 |

|     |                     |                          |          |          |          |          |          |          |          |          |          |
|-----|---------------------|--------------------------|----------|----------|----------|----------|----------|----------|----------|----------|----------|
|     | m39                 |                          |          |          |          |          |          |          |          |          |          |
| 840 | FN391274.1.1344_m38 | Candidatus Haloredivivus | 0.004794 | 0        | 0.008491 | 0        | 0.01478  | 0        | 0.021358 | 0        | 0        |
| 19  | EU722669.1.1444     | Halobacteriaceae         | 0.002582 | 0        | 0.003254 | 0.002614 | 0.00188  | 0.002625 | 0.002557 | 0        | 0.003402 |
| 14  | EF690585.1.1438     | Halobacteriaceae         | 0.003806 | 0        | 0.00231  | 0.003104 | 0.003108 | 0.002523 | 0.001713 | 0        | 0.002526 |
| 138 | FJ429313.1.1489     | Haloarcula               | 0.001639 | 0        | 0.00259  | 0        | 0.00371  | 0.002575 | 0.005353 | 0        | 0        |
| 133 | EU931577.1.1473     | Haloquadratum            | 0.001654 | 0.007636 | 0.003299 | 0.004134 | 0.005475 | 0.003659 | 0.002238 | 0.009666 | 0.007215 |
| 208 | AM947451.1.1344     | Halobacteriaceae         | 0.000754 | 0        | 0.004241 | 0        | 0.002215 | 0.003906 | 0.001617 | 0.003289 | 0.002076 |
| 82  | AM947499.1.1344     | Halorubrum               | 0.00176  | 0        | 0.001722 | 0.001025 | 0.00132  | 0.003207 | 0.001794 | 0        | 0.001798 |
| 222 | AY498650.1.1371     | Haloquadratum            | 0.002447 | 0.009774 | 0.001934 | 0.002441 | 0.000997 | 0.003425 | 0.00132  | 0.006855 | 0.003325 |
| 180 | FN391283.1.1344     | Halobacteriaceae         | 0.002836 | 0.00343  | 0.00167  | 0.001347 | 0.001151 | 0.003347 | 0.005383 | 0.004678 | 0.002821 |
| 173 | EF690565.1.1442     | Halobacteriaceae         | 0.001661 | 0.00484  | 0.003088 | 0.001898 | 0.004045 | 0.002762 | 0.00356  | 0.006176 | 0.004452 |
| 39  | AM947450.1.1345     | Haloquadratum            | 0.001472 | 0.002486 | 0.002396 | 0.002512 | 0.001356 | 0.004046 | 0.002663 | 0.004678 | 0.002857 |
| 34  | GQ282621.1.1473     | Halobacteriaceae         | 0.001773 | 0        | 0.001723 | 0.002637 | 0.0019   | 0.003298 | 0.003446 | 0        | 0.003072 |
| 200 | FN391291.1.1344     | Halobacteriaceae         | 0.001617 | 0.004429 | 0.002394 | 0.001709 | 0        | 0.003445 | 0.002011 | 0.002468 | 0.002274 |
| 23  | AM947468.1.1342     | Halobacteriaceae         | 0.002025 | 0.001427 | 0.002203 | 0.001544 | 0.001826 | 0.002336 | 0.005155 | 0.004043 | 0        |
| 565 | AM947493.1.1343     | Halobacteriaceae         | 0.003655 | 0.003633 | 0.002091 | 0.001796 | 0.001408 | 0.002888 | 0.003105 | 0        | 0        |
| 114 | AM947496.1.1351     | Haloarcula               | 0.001757 | 0        | 0.001595 | 0        | 0.001943 | 0.002643 | 0.002672 | 0        | 0.002497 |
| 177 | CU467118.3.1354     | Halorubrum               | 0.000687 | 0        | 0.002348 | 0.010385 | 0.003647 | 0.002425 | 0.001556 | 0.00657  | 0.007983 |
| 96  | FN391257.1.1346     | Halorhabdus              | 0.001423 | 0        | 0.001181 | 0        | 0.001715 | 0.001971 | 0.004604 | 0        | 0.002181 |
| 115 | AM947444.1.1348     | Haloquadratum            | 0.003032 | 0.002957 | 0.002798 | 0.001093 | 0.0018   | 0.002097 | 0.002028 | 0.00611  | 0.002936 |
| 130 | CU467153.1.1343     | Halobacteriaceae         | 0.001588 | 0.001819 | 0.002518 | 0.00097  | 0.001949 | 0.001969 | 0.003194 | 0.003011 | 0.001601 |
| 38  | FN391237.1.1353     | Halobacteriaceae         | 0.002555 | 0        | 0.001833 | 0        | 0.003562 | 0        | 0.001038 | 0        | 0        |
| 132 | FN391289.1.1340     | Halobacteriaceae         | 0.005003 | 0.006247 | 0.000789 | 0.003615 | 0.00145  | 0.007636 | 0.00498  | 0        | 0        |
| 24  | CU467116.3.1355     | Halorubrum               | 0.002295 | 0.003461 | 0.003161 | 0.002153 | 0.001291 | 0.002527 | 0.001019 | 0.008199 | 0.00396  |
| 93  | FJ172059.1.1341     | Halorubrum               | 0.001925 | 0.003787 | 0.001853 | 0.003766 | 0.001795 | 0.00723  | 0.002496 | 0.016173 | 0.005278 |
| 235 | AB012051.1.1441     | Halobacteriaceae         | 0.001705 | 0.002867 | 0.002057 | 0        | 0.001906 | 0        | 0        | 0        | 0.00112  |

|     |                 |                  |          |          |          |          |          |          |          |          |          |
|-----|-----------------|------------------|----------|----------|----------|----------|----------|----------|----------|----------|----------|
| 265 | CU467142.1.1344 | Halobacteriaceae | 0.001485 | 0        | 0.001474 | 0.002248 | 0.000677 | 0        | 0.000573 | 0        | 0        |
| 242 | CU467266.1.1348 | Halobacteriaceae | 0.002168 | 0        | 0.001269 | 0.002244 | 0.002095 | 0        | 0        | 0        | 0        |
| 54  | AM947441.1.1346 | Haloquadratum    | 0.001434 | 0.013005 | 0.001347 | 0.002055 | 0.002493 | 0.008917 | 0.001517 | 0.020319 | 0.004132 |
| 87  | AM947456.1.1341 | Halobacteriaceae | 0.002139 | 0.001272 | 0.001075 | 0        | 0.001138 | 0.002123 | 0.002064 | 0        | 0        |
| 75  | DQ103672.1.1407 | Halogeometricum  | 0.001705 | 0        | 0.001391 | 0.001422 | 0.003643 | 0.021416 | 0.010615 | 0.010668 | 0.003271 |
| 221 | FN391264.1.1348 | Halorubrum       | 0        | 0        | 0.000465 | 0.002566 | 0        | 0        | 0        | 0        | 0.003485 |
| 68  | CU467138.1.1341 | Haloquadratum    | 0.001077 | 0.003879 | 0.001411 | 0.001197 | 0.001375 | 0.001685 | 0.002508 | 0.017033 | 0.00392  |
| 0   | AM947471.1.1342 | Halobacteriaceae | 0.038747 | 0.024222 | 0.016573 | 0.002391 | 0.001665 | 0.002613 | 0.001708 | 0        | 0.002531 |
| 61  | CU467214.1.1346 | Haloquadratum    | 0.00025  | 0.000971 | 0.00058  | 0.002404 | 0.000062 | 0.003025 | 0.004699 | 0.005101 | 0.002206 |
| 161 | FN391250.1.1344 | Halorubrum       | 0        | 0        | 0.000754 | 0.001186 | 0        | 0.001758 | 0.00104  | 0.005423 | 0.001981 |

**Supplemental Table S4.** Profile of the composition of the 0.7 filter based on metagenomic analysis

| Organism Type                  | Percent by type | Group                  | Percent by Group |
|--------------------------------|-----------------|------------------------|------------------|
| Actinobacteria                 | 5.78            |                        |                  |
| Bacteroidetes                  | 0.74            |                        |                  |
| Proteobacteria                 | 0.04            | <b>BACTERIA</b>        | 6.56             |
| Halobonum                      | 0.43            |                        |                  |
| Halonotius                     | 0.78            |                        |                  |
| Halorubrum                     | 9.59            |                        |                  |
| Halosimplex                    | 0.41            |                        |                  |
| Natronomonas                   | 0.06            |                        |                  |
| Haloarcula                     | 0.63            |                        |                  |
| Haloquadratum                  | 20.02           |                        |                  |
| J07ABHX6<br>(Halobacteriales)  | 6.26            |                        |                  |
| J07ABHX67<br>(Halobacteriales) | 1.11            |                        |                  |
| J07HX5 (Halobacteriales)       | 4.52            |                        |                  |
| J07HX64<br>(Halobacteriales)   | 3.10            |                        |                  |
| Halobacteriales (novel)        | 31.17           |                        |                  |
|                                |                 | <b>ARCHAEA</b>         |                  |
| Other Haloarchaea              | 9.13            | <b>(Euryarchaeota)</b> | 87.22            |
| Nanosalina                     | 4.19            |                        |                  |
| Nanosalinarum                  | 1.81            |                        |                  |
| Haloredivivus                  | 0.22            | <b>NANOHALOARCHAEA</b> | 6.22             |
|                                | 100.00          |                        | 100.00           |

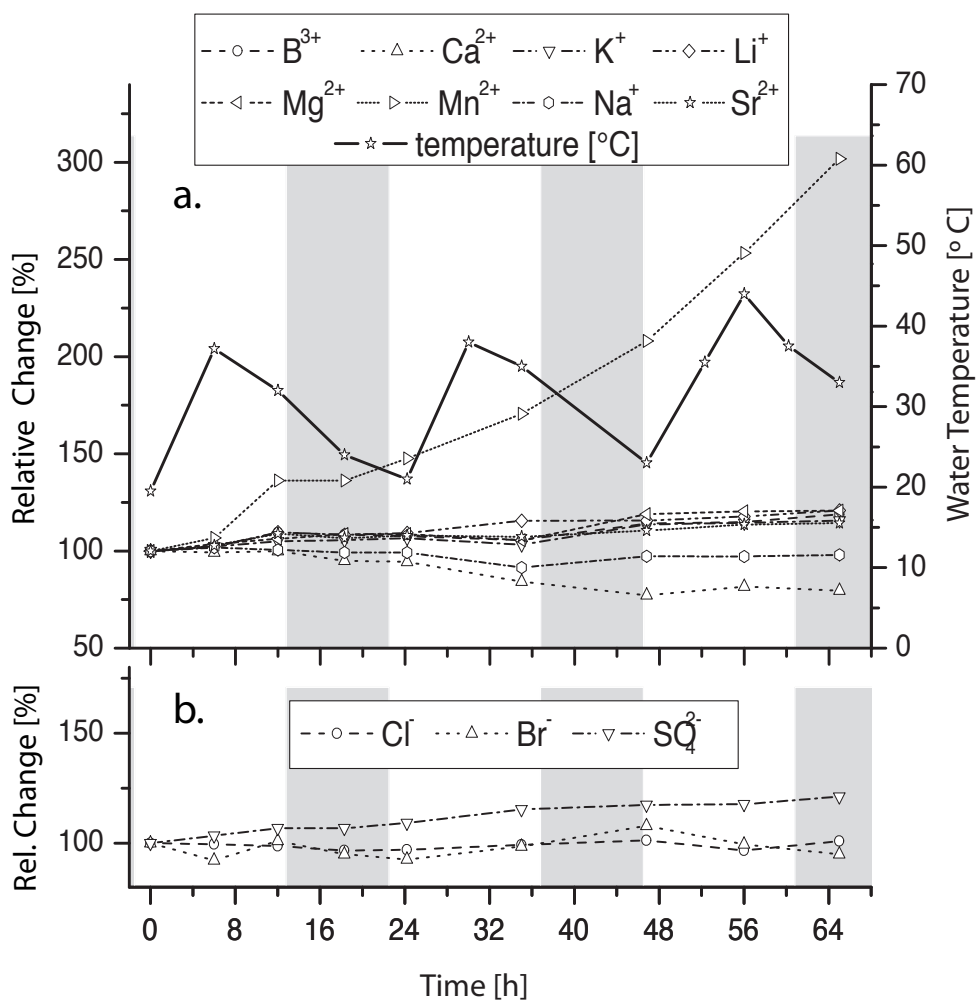

**Supplemental Figure S1.** Relative changes in ion concentrations during the sampling period.  
 a) relative change in cation concentrations and lake water temperature [°C] vs. time [h]  
 b) relative change in anion concentrations vs. time [h]. Grey areas: times without daylight.

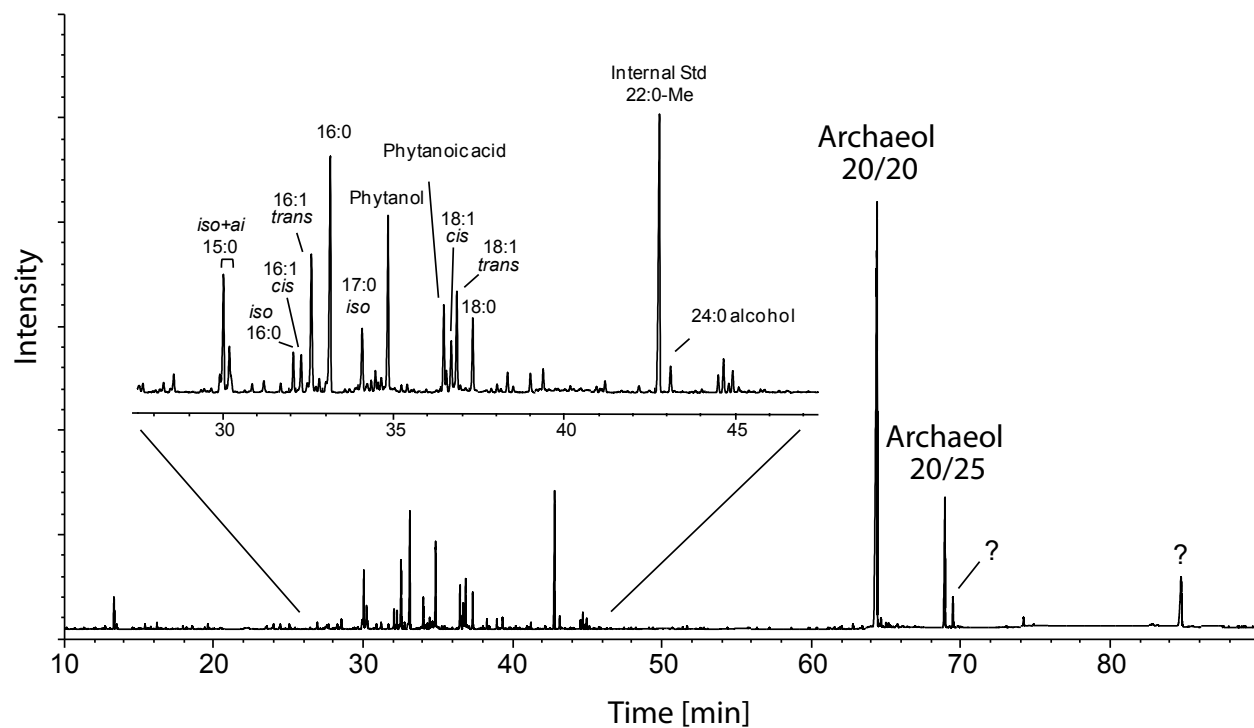

**Supplemental Figure S2.** Typical GC-FID chromatogram of lipids derived from alkaline hydrolysis of planktonic microorganisms in Lake Tyrrell obtained by filtration and taken at  $t=0$  hours.

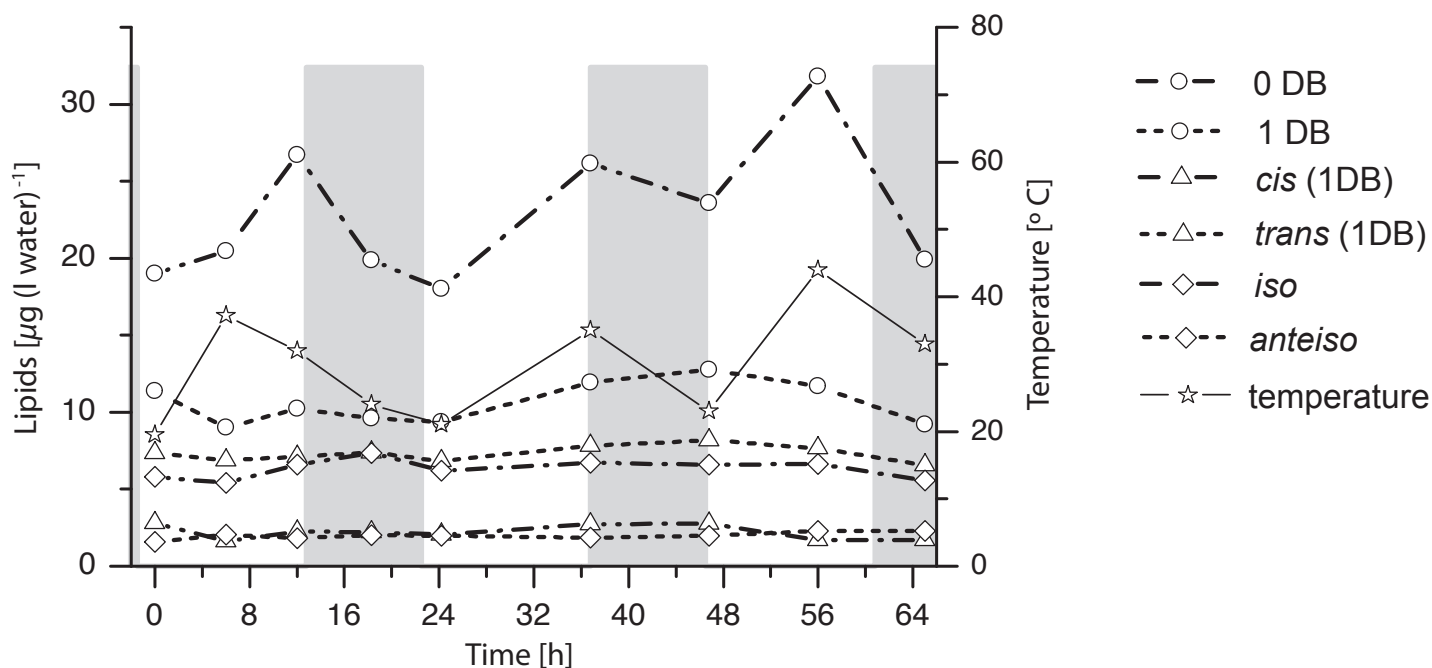

**Supplemental Figure S3.** Concentrations of different groups of fatty acids [ $\mu\text{g (l lake water)}^{-1}$ ] vs. time [h] plotted as sums of: 0 DB (iso/anteiso-C15:0, iso-C16:0, n-C16:0, iso C17:0, n-C18:0 and C17:0 2-OH fatty acids); 1 DB (cis/trans-C16:1, and cis/trans-C18:1); cis (cis-C16:1, and cis-C18:1); trans (trans-C16:1 and trans-C18:1); iso (iso-C15:0, iso-C16:0, iso-C17:0) and anteiso (anteiso-C15:0). As additional information, water temperature (stars) on each sampling point is given in  $^{\circ}\text{C}$  and grey areas show hours without daylight.



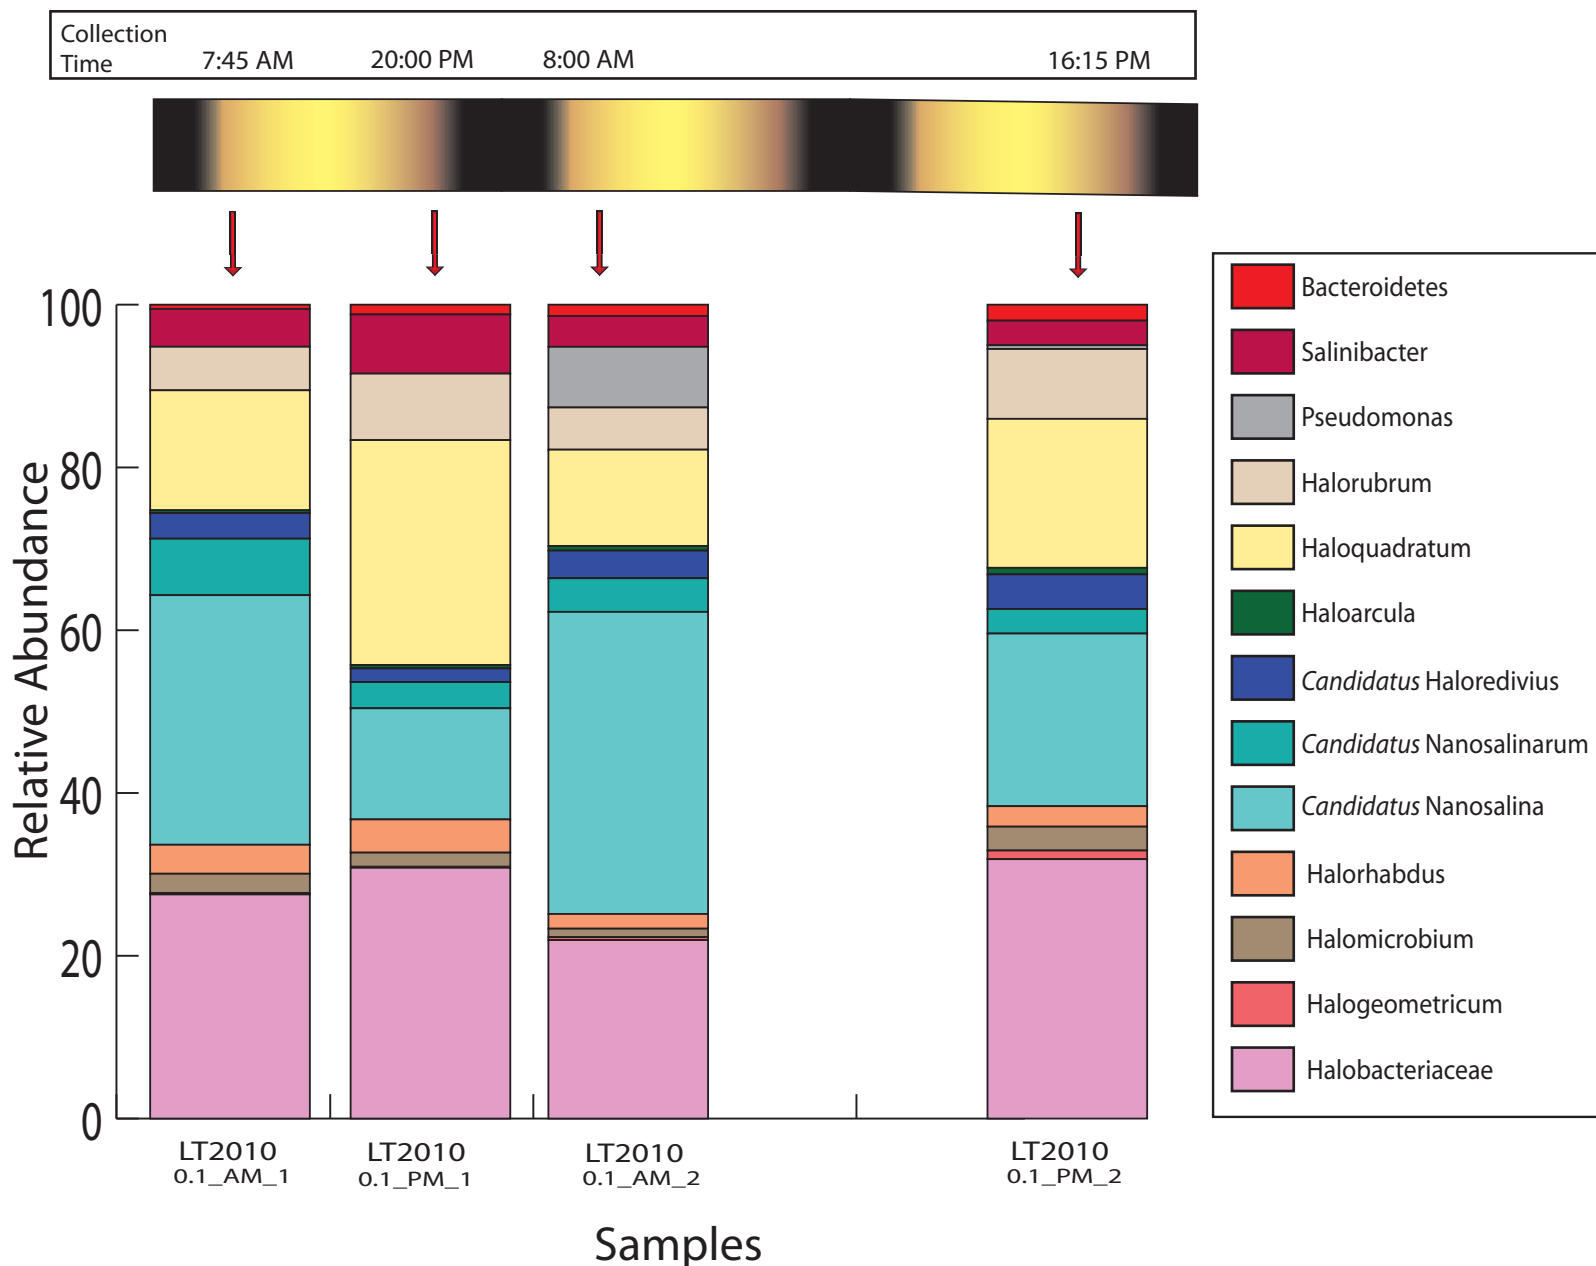

**Supplemental Figure S4.** Nanohaloarchaea and Halobacteria exhibit opposite relative abundance trends in 0.1  $\mu\text{m}$  filter samples during a diel cycle based on reconstructed 16S rRNA abundance patterns. The relative abundances of the 12 potential OTUs defined from the 80 reconstructed 16S rRNA genes are displayed as stacked bar charts for the four time-points for which 0.1  $\mu\text{m}$  filter sample datasets were available. The collection time of each sample is shown at the top, as in Figure 2. The taxonomic assignment for each OTU is limited to Genus-level, with corresponding colors depicted in the legend.
